# Supplementary material for: Tuning Metallic Co0.85Se Quantum Dots/Carbon Hollow Polyhedrons with Tertiary Hierarchical Structure for High-Performance Potassium Ion Batteries
Source: PubMed Central journal article supplement (PMC7770851; doi:10.1007/s40820-019-0326-5), 2019-11-01
Supplement: 40820_2019_326_MOESM1_ESM.pdf [file 40820_2019_326_MOESM1_ESM.pdf]

Supporting Information for

## Tuning Metallic $\text{Co}_{0.85}\text{Se}$ Quantum Dots/Carbon Hollow Polyhedrons with Tertiary Hierarchical Structure for High-Performance Potassium Ion Batteries

Zhiwei Liu<sup>1</sup>, Kun Han<sup>1</sup>, Ping Li<sup>1,\*</sup>, Wei (Alex) Wang<sup>2,\*</sup>, Donglin He<sup>1</sup>, Qiwei Tan<sup>1</sup>, Leying Wang<sup>1</sup>, Yang Li<sup>3</sup>, Mingli Qin<sup>1</sup>, Xuanhui Qu<sup>1</sup>

<sup>1</sup>Beijing Advanced Innovation Center for Materials Genome Engineering, Institute for Advanced Materials and Technology, University of Science and Technology Beijing, Beijing 100083, People's Republic of China

<sup>2</sup>Beijing Key Laboratory of Bio-inspired Energy Materials and Devices, School of Space and Environment, Beihang University, Beijing 100191, People's Republic of China

<sup>3</sup>Department of Chemical Engineering, Polytechnique Montreal, Montreal, Quebec, H3C 3A7, Canada

Zhiwei Liu and Kun Han contributed equally to this work

\*Corresponding authors. E-mail: ustbliping@126.com (Ping Li); wwang3@g.harvard.edu (Wei (Alex) Wang)

### Supplementary Figures, Tables, and Discussion

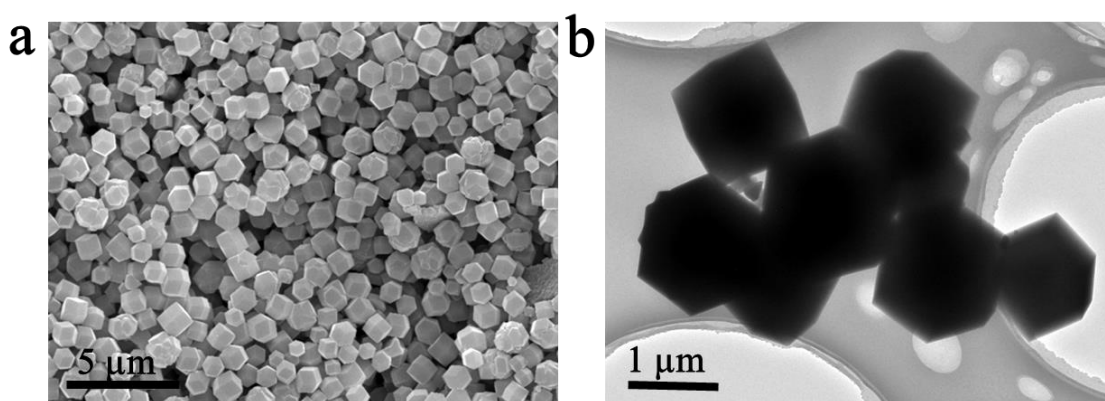

**Fig. S1** a FESEM and b TEM images of ZIF-67

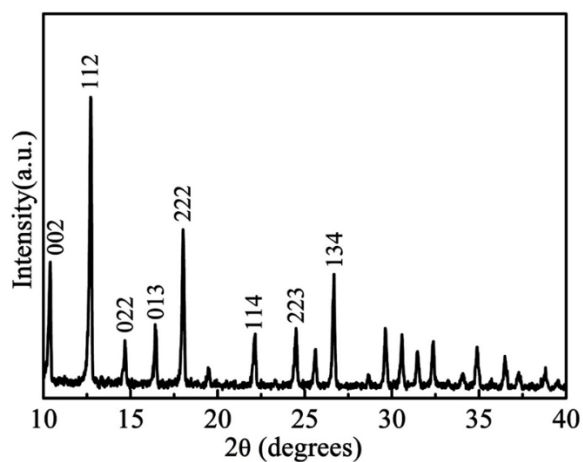

Fig. S2 XRD pattern of ZIF-67

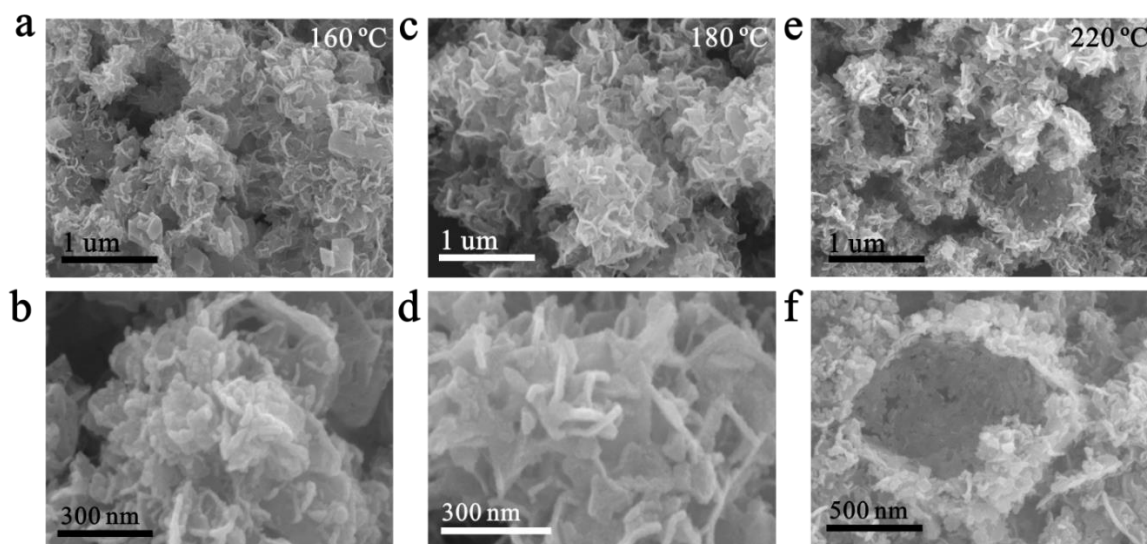

Fig. S3 FESEM images of a, b  $\text{Co}_{0.85}\text{Se}$ -QDs/C-160, c, d  $\text{Co}_{0.85}\text{Se}$ -QDs/C-180, and e, f  $\text{Co}_{0.85}\text{Se}$ -QDs/C-220

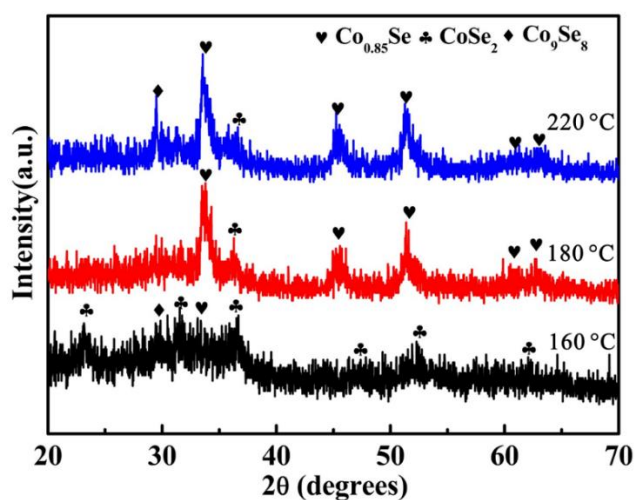

Fig. S4 XRD patterns of  $\text{Co}_{0.85}\text{Se}$ -QDs/C-160,  $\text{Co}_{0.85}\text{Se}$ -QDs/C-180, and  $\text{Co}_{0.85}\text{Se}$ -QDs/C-220

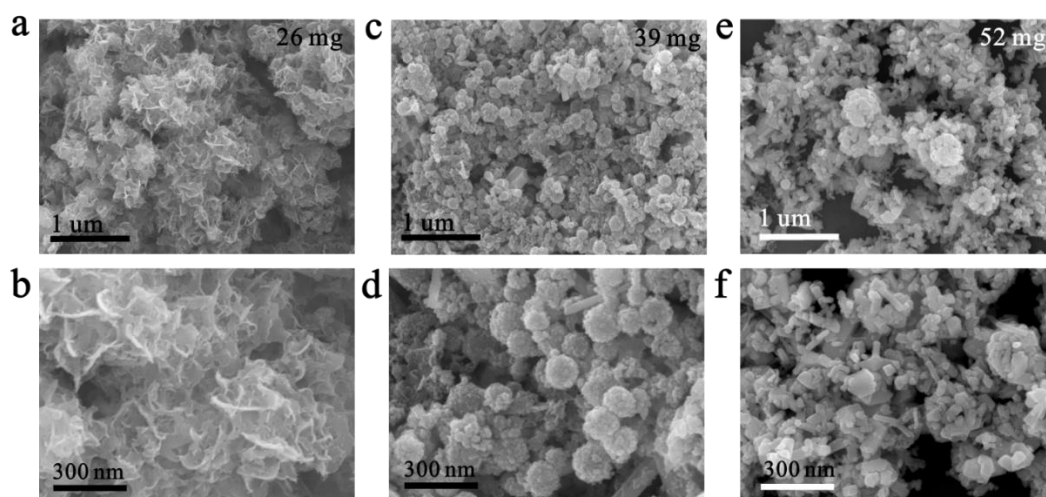

**Fig. S5** FESEM images of **a, b**  $\text{Co}_{0.85}\text{Se}$ -QDs/C-26, **c, d**  $\text{Co}_{0.85}\text{Se}$ -QDs/C-39, and **e, f**  $\text{Co}_{0.85}\text{Se}$ -QDs/C-52

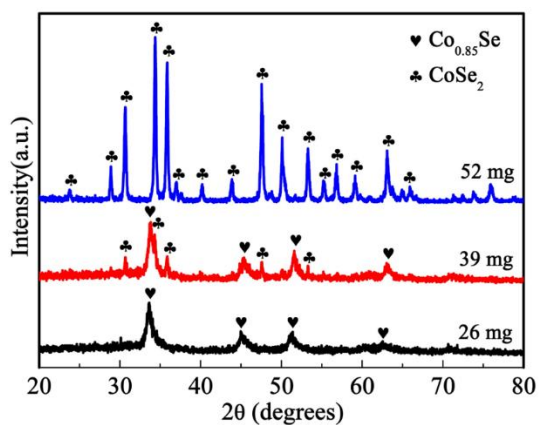

**Fig. S6** XRD patterns of  $\text{Co}_{0.85}\text{Se}$ -QDs/C-26,  $\text{Co}_{0.85}\text{Se}$ -QDs/C-39, and  $\text{Co}_{0.85}\text{Se}$ -QDs/C-52

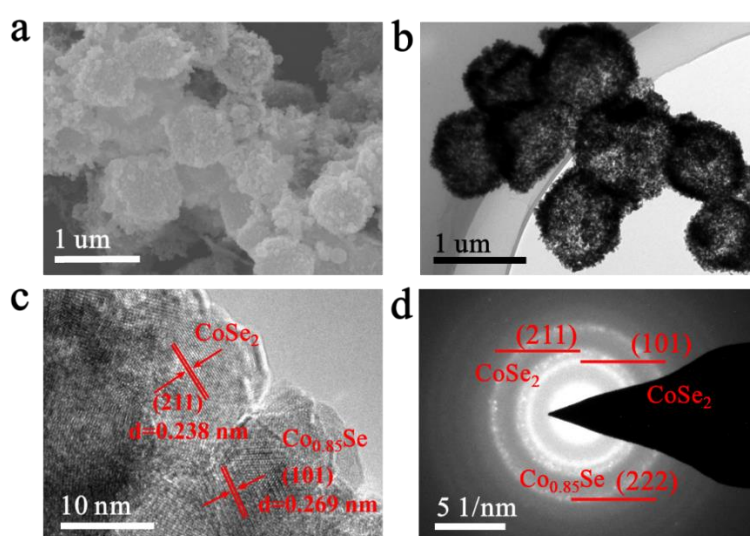

**Fig. S7** **a** FESEM image, **b** TEM images, **c** HRTEM, and **d** SEAD images of  $\text{Co}_{0.85}\text{Se}$ -QDs/C-10

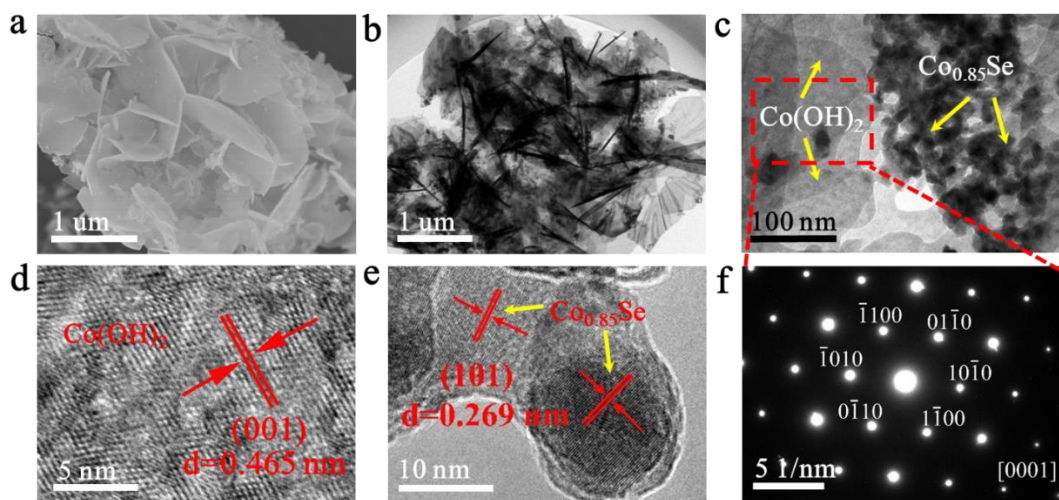

**Fig. S8** a FESEM image, b, c TEM images, d, e HRTEM, and d SEAD images of  $\text{Co}_{0.85}\text{Se}$ -QDs/C-2

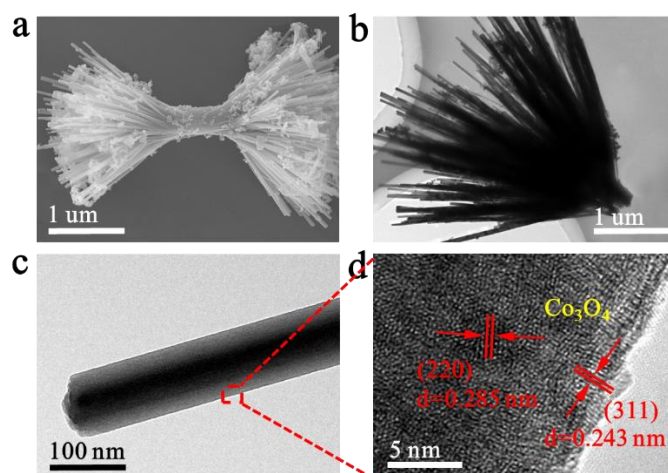

**Fig. S9** a FESEM image, b TEM image, c HRTEM, and d SEAD images of  $\text{Co}_{0.85}\text{Se}$ -QDs/C-0

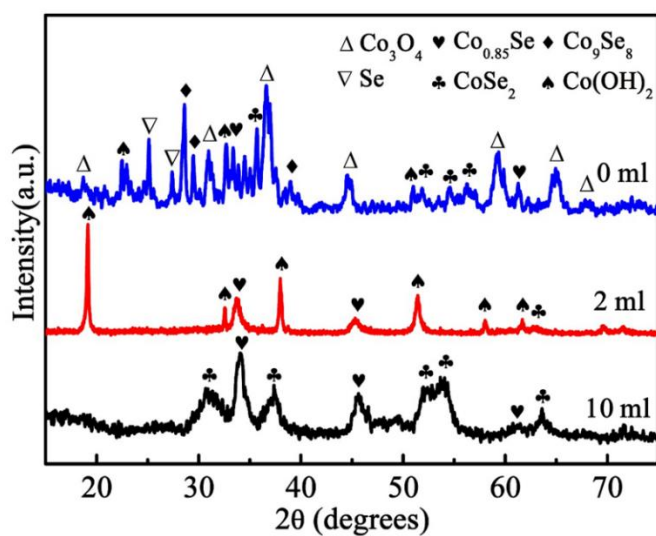

**Fig. S10** XRD patterns of  $\text{Co}_{0.85}\text{Se}$ -QDs/C-10,  $\text{Co}_{0.85}\text{Se}$ -QDs/C-2 and  $\text{Co}_{0.85}\text{Se}$ -QDs/C-0



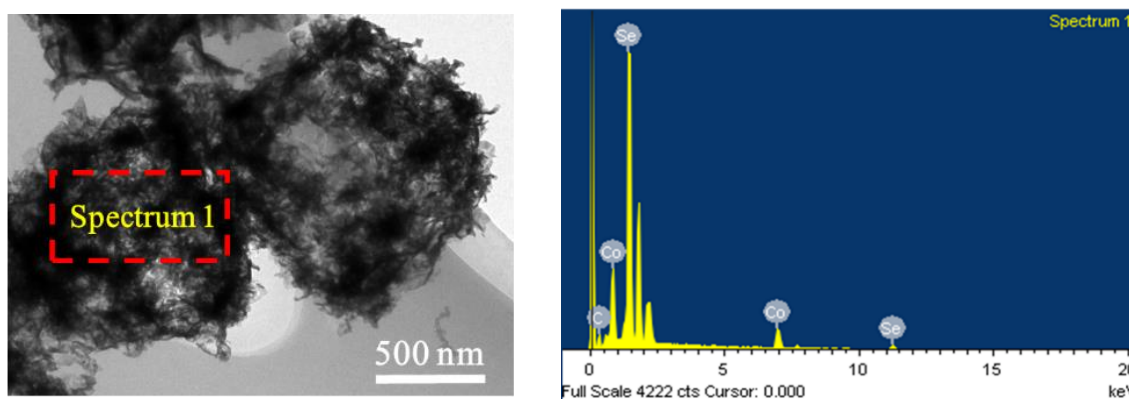

**Fig. S11** TEM micrographs and EDS spectra of  $\text{Co}_{0.85}\text{Se-QDs/C-20}$ . Elemental spectra correspond to the Spectrum 1 point on the TEM micrograph

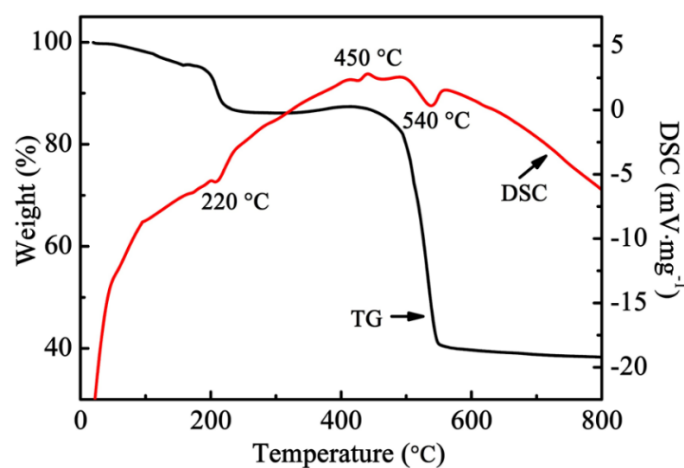

**Fig. S12** TG-DSC curves of as-prepared  $\text{Co}_{0.85}\text{Se-QDs/C-20}$

Figure S12 shows the TG/DSC curves of  $\text{Co}_{0.85}\text{Se-QDs/C-20}$ . A weight loss happened from 20 to 150 °C is attributed to the removal of the adsorbed water on the surfaces of  $\text{Co}_{0.85}\text{Se-QDs/C-20}$ . The weight loss in the range of 150 to 250 °C is contributed to the combustion of organic species in  $\text{Co}_{0.85}\text{Se-QDs/C-20}$  [S1], corresponding to a small decalescence peak located at about 220 °C in the DSC curve. The weight increase occurred at 400 °C due to the partial oxidation of  $\text{Co}_{0.85}\text{Se}$  to  $\text{CoSeO}_4$  and  $\text{SeO}_2$ , and subsequent acute weight losses occurred in the range of 500 to 550 °C due to the oxidation of  $\text{Co}_{0.85}\text{Se}$  into  $\text{Co}_3\text{O}_4$ , the conversion of  $\text{CoSeO}_4$  to  $\text{Co}_3\text{O}_4$  and the evaporation of  $\text{SeO}_2$  [S2]. In addition, the complex reactions are accompanied with the oxidation of carbon. The weight decrease corresponds to an obvious decalescence peak at 540 °C. The TG result also confirmed the mass content of carbon in the  $\text{Co}_{0.85}\text{Se-QDs/C-20}$ . The total reaction can be simply written as:

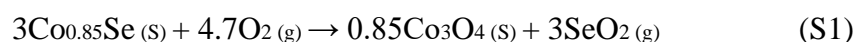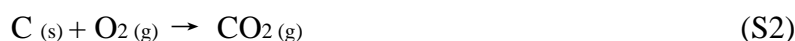

According to the final weight of the  $\text{Co}_3\text{O}_4$ , it can be calculated the weight of the  $\text{Co}_{0.85}\text{Se}$  and

carbon. The original weight is kept for the final products is 38%. Except for the common weight loss of adsorption water and organic species of 13%, based on the reaction (S1), the mass content of  $\text{Co}_{0.85}\text{Se}$  and carbon in  $\text{Co}_{0.85}\text{Se-QDs/C-20}$  is calculated as about 72 wt% ( $0.38 \times 3 \times 129.15 / (0.85 \times 241) = 72$  wt%) and 15 wt%, respectively.

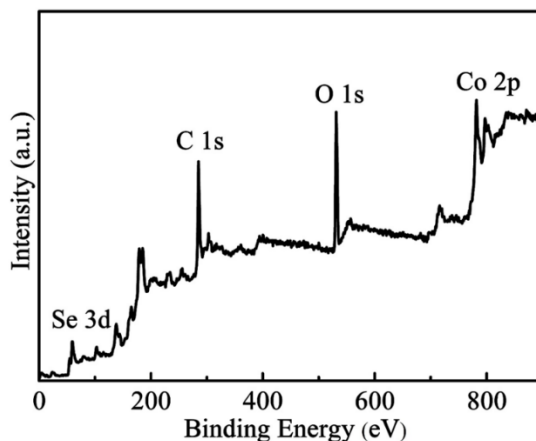

**Fig. S13** The survey XPS spectrum of as-prepared  $\text{Co}_{0.85}\text{Se-QDs/C-20}$

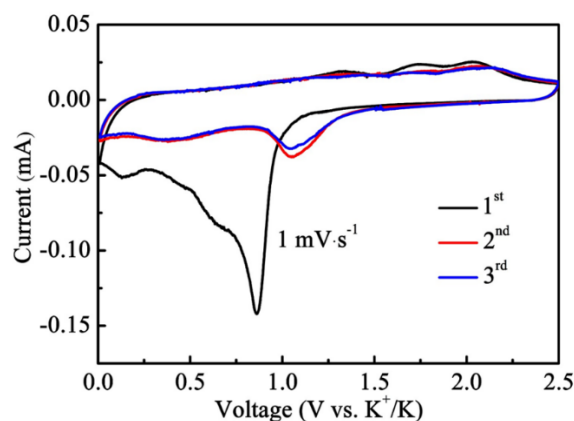

**Fig. S14** Cyclic voltammograms of  $\text{Co}_{0.85}\text{Se-QDs/C-20}$  in the voltage range of 0.01-2.5 V at a scan rate of  $0.1 \text{ mV s}^{-1}$

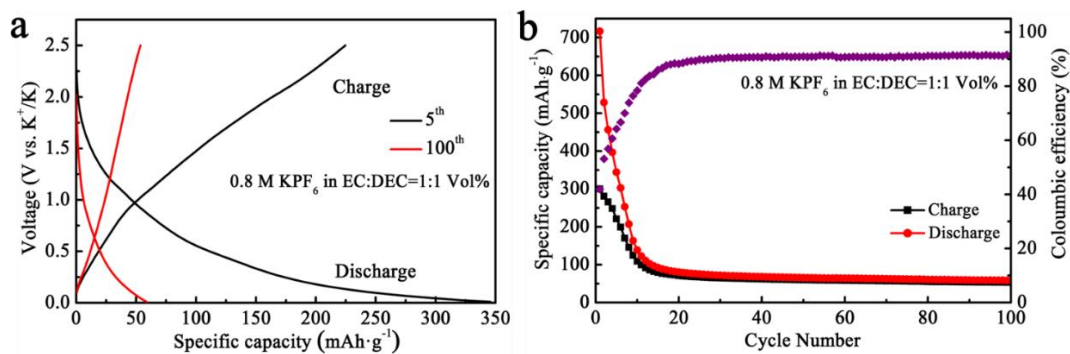

**Fig. S15 a** Discharge/charge voltage profiles of  $\text{Co}_{0.85}\text{Se-QDs/C-20}$  with the 5<sup>th</sup> and 100<sup>th</sup> cycling. **b** Cycling performance of  $\text{Co}_{0.85}\text{Se-QDs/C-20}$  at a current rate of  $50 \text{ mA g}^{-1}$  when using the electrolyte of 0.8 M  $\text{KPF}_6$  in EC: DEC

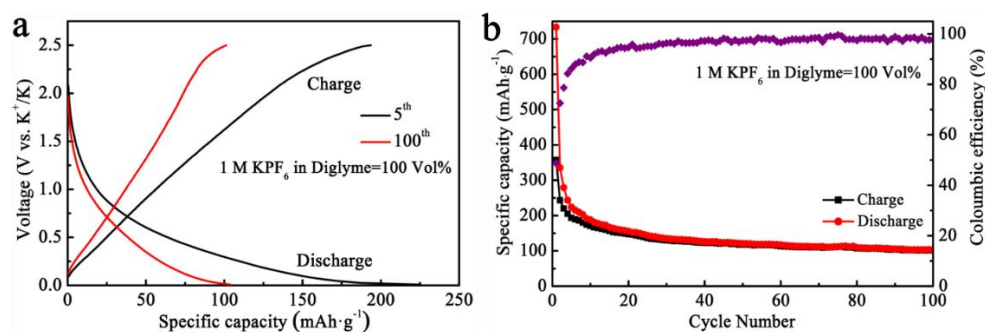

**Fig. S16** **a** Discharge/charge voltage profiles of  $\text{Co}_{0.85}\text{Se-QDs/C-20}$  with the 5<sup>th</sup> and 100<sup>th</sup> cycling. **b** Cycling performance of  $\text{Co}_{0.85}\text{Se-QDs/C-20}$  at a current rate of  $50 \text{ mA g}^{-1}$  when using the electrolyte of  $1 \text{ M KPF}_6$  in Diglyme

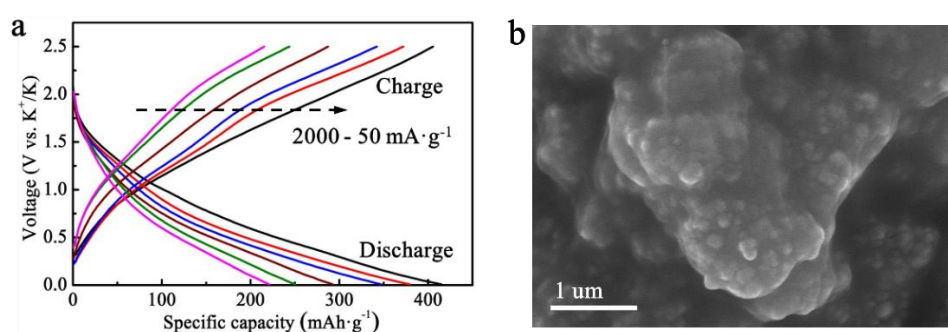

**Fig. S17** **a** Galvanostatic discharge/charge curves of  $\text{Co}_{0.85}\text{Se-QDs/C-20}$  at different rates. From right to left:  $50, 100, 200, 500, 1000,$  and  $2000 \text{ mA g}^{-1}$ , **b** FESEM images of the  $\text{Co}_{0.85}\text{Se-QDs/C-20}$  electrode after 100 cycles at a current density of  $100 \text{ mA g}^{-1}$

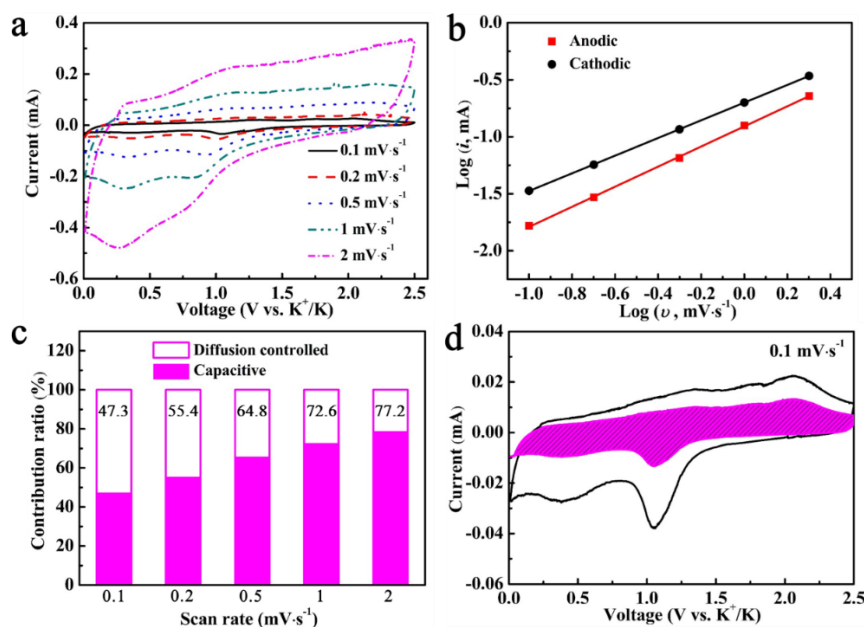

**Fig. S18** The potential pseudocapacitive behavior of the  $\text{Co}_{0.85}\text{Se-QDs/C-20}$  electrode. **a** CV profiles at different scan rates. **b** the plots of  $\log(i)$  vs.  $\log(v)$  (peak current:  $i$ , scan rate:  $v$ ) of  $\text{Co}_{0.85}\text{Se-QDs/C-20}$ . **c** The percentages of pseudocapacitive contributions at different scan rates. **d** The purple region shows the CV profile with the pseudocapacitive contribution at scan rate of  $0.1 \text{ mV s}^{-1}$

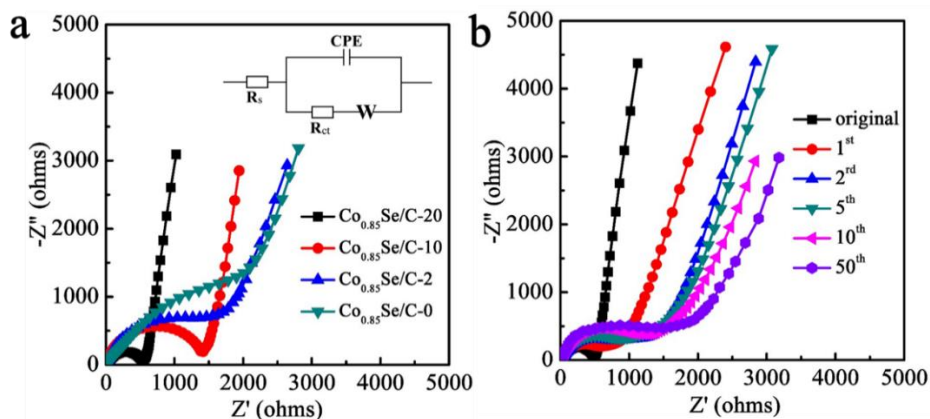

**Fig. S19 a** Nyquist plots of  $\text{Co}_{0.85}\text{Se}$ -QDs/C-20,  $\text{Co}_{0.85}\text{Se}$ -QDs/C-10,  $\text{Co}_{0.85}\text{Se}$ -QDs/C-2, and  $\text{Co}_{0.85}\text{Se}$ -QDs/C-0 in original cycle (insert of the simplified equivalent circuit model). **b** Nyquist plots of  $\text{Co}_{0.85}\text{Se}$ -QDs/C-20 in the original, 1<sup>st</sup>, 2<sup>nd</sup>, 5<sup>th</sup>, 10<sup>th</sup>, and 50<sup>th</sup> cycling cycles

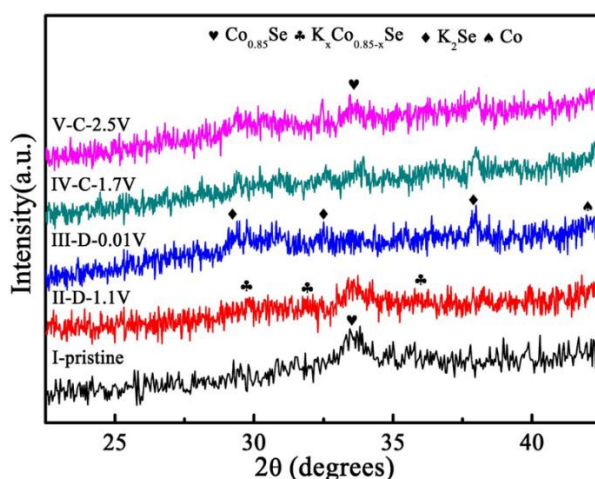

**Fig. S20** The *ex-situ* XRD patterns of  $\text{Co}_{0.85}\text{Se}$ -QDs/C-20 electrode at various voltage

During the first discharge cycle, the formation of  $\text{K}_x\text{Co}_{0.85-x}\text{Se}$  by insertion of the K-ion into the interlayer of  $\text{Co}_{0.85}\text{Se}$  is similar to the reaction process of  $\text{Co}_{0.85}\text{Se}$  in LIBs [S3]. At the discharge voltage from 1.1 to 0.01 V, the appearance of  $\text{K}_2\text{Se}$  peaks was attributed to the conversion reaction of  $\text{K}_x\text{Co}_{0.85-x}\text{Se}$  to form  $\text{K}_2\text{Se}$  and metal Co. When the charge voltage returns to 2.5 V, the obvious  $\text{Co}_{0.85}\text{Se}$  peaks show that  $\text{K}_2\text{Se}$  and metal Co are converted back to  $\text{Co}_{0.85}\text{Se}$ .

**Table S1** The element content of  $\text{Co}_{0.85}\text{Se}$ -QDs/C-20 via EDS analysis

| Element | Weight (%) | Atomic (%) |
|---------|------------|------------|
| C       | 27.75      | 69.05      |
| Co      | 28.45      | 14.40      |
| Se      | 43.80      | 16.55      |
| Totals  | 100.00     | 100.00     |



**Table S2** Electrochemical performance comparison of some reported negative materials of KIBs

| Active materials                                    | Electrochemical performance                                                                                                          | References       |
|-----------------------------------------------------|--------------------------------------------------------------------------------------------------------------------------------------|------------------|
| <b>Co<sub>0.85</sub>Se-QDs/C-20</b>                 | <b>402 mAh g<sup>-1</sup> for 100 cycles at 50 mA g<sup>-1</sup>,<br/>228 mAh g<sup>-1</sup> for 500 cycles at 1A g<sup>-1</sup></b> | <b>This work</b> |
| Graphite                                            | 100 mAh g <sup>-1</sup> for 50 cycles at 140 mA g <sup>-1</sup>                                                                      | [S4]             |
| Soft carbon                                         | 185 mAh g <sup>-1</sup> for 50 cycles at 558 mA g <sup>-1</sup>                                                                      | [S4]             |
| Hard carbon                                         | 216 mAh g <sup>-1</sup> for 100 cycles at 27.9 mA g <sup>-1</sup>                                                                    | [S5]             |
| S, O-codoped hard carbon                            | 201 mAh g <sup>-1</sup> for 200 cycles at 200 mA g <sup>-1</sup>                                                                     | [S6]             |
| Carbon nanofibers                                   | 80 mAh g <sup>-1</sup> after 20 cycles at 50 mA g <sup>-1</sup>                                                                      | [S7]             |
| NCNFs-650                                           | 248 mAh g <sup>-1</sup> after 100 cycles at 500 mA g <sup>-1</sup>                                                                   | [S8]             |
| RGO films                                           | 120 mAh g <sup>-1</sup> after 100 cycles at 10 mA g <sup>-1</sup>                                                                    | [S9]             |
| Polynanocrystalline graphite                        | 80 mAh g <sup>-1</sup> after 300 cycles at 100 mA g <sup>-1</sup>                                                                    | [S10]            |
| N-doped graphene                                    | 210 mAh g <sup>-1</sup> after 100 cycles at 100 mA g <sup>-1</sup>                                                                   | [S11]            |
| VSe <sub>2</sub> nanosheet                          | 150 mAh g <sup>-1</sup> after 500 cycles at 2 A g <sup>-1</sup>                                                                      | [S12]            |
| N, P-codoped carbon/CoP                             | 127 mAh g <sup>-1</sup> after 1000 cycles at 100 mA g <sup>-1</sup>                                                                  | [S13]            |
| MoSe <sub>2</sub> /C                                | 322 mAh g <sup>-1</sup> after 100 cycles at 200 mA g <sup>-1</sup>                                                                   | [S14]            |
| MoS <sub>2</sub> @SnO <sub>2</sub> @C               | 312 mAh g <sup>-1</sup> after 25 cycles at 50 mA g <sup>-1</sup>                                                                     | [S15]            |
| KTi <sub>2</sub> (PO <sub>4</sub> ) <sub>3</sub> @C | 221 mAh g <sup>-1</sup> after 50 cycles at 20 mA g <sup>-1</sup>                                                                     | [S16]            |
| MoS <sub>2</sub>                                    | 65 mAh g <sup>-1</sup> after 200 cycles at 20 mA g <sup>-1</sup>                                                                     | [S17]            |
| a-Ti <sub>3</sub> C <sub>2</sub>                    | 98 mAh g <sup>-1</sup> for 20 cycles at 20 mA g <sup>-1</sup>                                                                        | [S18]            |

**Table S3** A comparison of the electronic conductivity of the Co<sub>0.85</sub>Se-QDs/C-20 and pure Co<sub>0.85</sub>Se

| Sample                         | Electronic conductivity (S m <sup>-1</sup> ) |
|--------------------------------|----------------------------------------------|
| Co <sub>0.85</sub> Se-QDs/C-20 | 2.4×10 <sup>3</sup>                          |
| Co <sub>0.85</sub> Se          | 2.9×10 <sup>-5</sup>                         |

**Table S4** The structure information and total energy of different compositions

| Sample                                         | a     | b     | c     | $\alpha$ | $\beta$ | $\gamma$ | Volume | Total energy (eV) |
|------------------------------------------------|-------|-------|-------|----------|---------|----------|--------|-------------------|
| Co <sub>7</sub> Se <sub>8</sub>                | 6.274 | 7.186 | 7.189 | 74       | 60      | 106      | 231.46 | -80.77            |
| Co                                             | 2.530 | 2.530 | 3.994 | 90       | 90      | 120      | 22.14  | -14.31            |
| K                                              | 5.259 | 5.259 | 5.259 | 90       | 90      | 90       | 145.44 | -2.28             |
| K <sub>1</sub> Co <sub>6</sub> Se <sub>8</sub> | 6.773 | 7.300 | 7.146 | 76       | 60      | 104      | 270.80 | -73.64            |
| K <sub>2</sub> Co <sub>5</sub> Se <sub>8</sub> | 7.813 | 7.164 | 7.166 | 73       | 61      | 100      | 310.30 | -69.92            |
| K <sub>3</sub> Co <sub>4</sub> Se <sub>8</sub> | 8.327 | 7.288 | 7.130 | 78       | 61      | 103      | 339.94 | -67.49            |
| K <sub>4</sub> Co <sub>3</sub> Se <sub>8</sub> | 8.436 | 7.765 | 7.436 | 77       | 61      | 103      | 382.78 | -60.03            |

## Supplementary References

- [S1] W. Ma, Y.F. Guo, X.H. Liu, D. Zhang, T. Liu et al., Nickel dichalcogenide hollow spheres: controllable fabrication, structural modification, and magnetic properties. *Chem. Eur. J.* **19**, 15467-15471 (2013). <https://doi.org/10.1002/chem.201302716>
- [S2] Z.P. Li, H.T. Xue, J.Q. Wang, Y.B. Tang, C.S. Lee, S.R. Yang, Reduced graphene oxide/marcasite-type cobalt selenide nanocrystals as an anode for lithium-ion batteries with excellent cyclic performance. *ChemElectroChem* **2**, 1682-1686 (2015). <https://doi.org/10.1002/celec.201500179>
- [S3] J.S. Zhou, Y. Wang, J. Zhang, T.P. Chen, H.H. Song, H.Y. Yang, Two dimensional layered Co<sub>0.85</sub>Se nanosheets as a high-capacity anode for lithium-ion batteries. *Nanoscale* **8**, 14992-15000 (2016). <https://xs.scihub.ltd/10.1039/C6NR03571J>
- [S4] Y.F. Dong, Z.S. Wu, S.H. Zheng, X.H. Wang, J.Q. Qin et al., Ti<sub>3</sub>C<sub>2</sub> MXene-derived sodium/potassium titanate nanoribbons for high-performance sodium/potassium ion batteries with enhanced capacities. *ACS Nano* **11**, 4792-4800 (2017). <https://doi.org/10.1021/acsnano.7b01165>
- [S5] B.F. Ji, F. Zhang, X.H. Song, Y.B. Tang, A novel potassium-ion-based dual-ion battery. *Adv. Mater.* **29**, 1700519 (2017). <https://doi.org/10.1002/adma.201700519>
- [S6] M. Chen, W. Wang, X. Liang, S. Gong, J. Liu, Q. Wang, S.J. Guo, H. Yang, Sulfur/oxygen codoped porous hard carbon microspheres for high-performance potassium-ion batteries. *Adv.*

- Energy Mater. **8**, 1800171 (2018). <https://doi.org/10.1002/aenm.201800171>
- [S7] Z.L. Jian, Z.Y. Xing, C. Bommier, Z.F. Li, X.L. Ji, Hard carbon microspheres: potassium-ion anode versus sodium-ion anode. *Adv. Energy Mater.* **6**, 1501874 (2016). <https://doi.org/10.1002/aenm.201501874>
- [S8] Y. Xu, C.L. Zhang, M. Zhou, Q. Fu, C.X. Zhao, M.H. Wu, Y. Lei, Highly nitrogen doped carbon nanofibers with superior rate capability and cyclability for potassium ion batteries. *Nat. Commun.* **9**, 1720 (2018). <https://doi.org/10.1038/s41467-018-04190-z>
- [S9] J. Han, M.W. Xu, Y.B. Niu, G.N. Li, M.Q. Wang et al., Exploration of  $K_2Ti_8O_{17}$  as an anode material for potassium-ion batteries. *Chem. Commun.* **52**, 11274-11276 (2016). <https://doi.org/10.1039/C6CC05102B>
- [S10] J. Han, Y.B. Niu, S.J. Bao, Y.N. Yu, S.Y. Lu, M.W. Xu, Nanocubic  $KTi_2(PO_4)_3$  electrodes for potassium-ion batteries. *Chem. Commun.* **52**, 11661-11664 (2016). <https://doi.org/10.1039/C6CC06177J>
- [S11] K. Share, A.P. Cohn, R. Carter, B. Rogers, C.L. Pint, Role of nitrogen-doped graphene for improved high-capacity potassium ion battery anodes. *ACS Nano* **10**, 9738-9744 (2016). <https://doi.org/10.1021/acs.nano.6b05998>
- [S12] C. Yang, J.R. Feng, F. Lv, J.H. Zhou, C.F. Lin et al., Metallic graphene-like  $VSe_2$  ultrathin nanosheets: superior potassium-ion storage and their working mechanism. *Adv. Mater.* **30**, 1800036 (2018). <https://doi.org/10.1002/adma.201800036>
- [S13] J. Bai, B.J. Xi, H.Z. Mao, Y. Lin, X.J. Ma, J.K. Feng, S.L. Xiong, One-step construction of N,P-Co-doped porous carbon sheets/CoP hybrids with enhanced lithium and potassium storage. *Adv. Mater.* **30**, 1802310 (2018). <https://doi.org/10.1002/adma.201802310>
- [S14] W. Wang, B. Jiang, C. Qian, F. Lv, J.R. Feng et al., Pistachio-shuck-like  $MoSe_2/C$  core/shell nanostructures for high-performance potassium-ion storage. *Adv. Mater.* **30**, 1801812 (2018). <https://doi.org/10.1002/adma.201801812>
- [S15] Z. Chen, D.G. Yin, M. Zhang, Sandwich-like  $MoS_2@SnO_2@C$  with high capacity and stability for sodium/potassium ion batteries. *Small* **14**, 1703818 (2018). <https://doi.org/10.1002/sml.201703818>
- [S16] Z.X. Wei, D.X. Wang, M.L. Li, Y. Gao, C.Z. Wang, G. Chen, F. Du, Fabrication of hierarchical potassium titanium phosphate spheroids: a host material for sodium-ion and potassium-ion storage. *Adv. Energy Mater.* **8**, 1801102 (2018). <https://doi.org/10.1002/aenm.201801102>
- [S17] X.D. Ren, Q. Zhao, W.D. McCulloch, Y.Y. Wu,  $MoS_2$  as a long-life host material for potassium ion intercalation. *Nano Res.* **10**, 1313-1321 (2017). <https://doi.org/10.1007/s12274-016-1419-9>
- [S18] P.C. Lian, Y.F. Dong, Z.S. Wu, S.H. Zheng, X.H. Wang et al., Alkalized  $Ti_3C_2$  MXene nanoribbons with expanded interlayer spacing for high-capacity sodium and potassium ion batteries. *Nano Energy* **40**, 1-8 (2017). <https://doi.org/10.1016/j.nanoen.2017.08.002>
